# Supplementary material
Source: Research Square preprint supplement (doi:10.21203/rs.3.rs-6956402/v1)
Supplement: Supplementary file 1 [file d7d4cda0ea38f0e217f05a05.docx]

Appendix A: 4R Model of Generative AI-Based Emotional Support Scale: Regulation, Resonance, Reinforcement, and Reflection

| Regulation1 | When I feel down, generative artificial intelligence can tell a funny joke to make me laugh and help alleviate my negative emotions. |
| --- | --- |
| Regulation2 | When I feel low, generative artificial intelligence will play a light-hearted song or my favorite music to help me adjust my mood. |
| Regulation3 | Generative artificial intelligence guides me to express my emotions, helping me release them through conversation or other means. |
| Regulation4 | When I feel down, generative artificial intelligence recommends activities that can trigger positive emotions, such as exercise, travel, or socializing with friends. |
| Regulation5 | Generative artificial intelligence suggests changing my environment, like resting in a different place, to reduce the triggers of negative emotions. |
| Resonance1 | Whenever I speak, generative artificial intelligence listens patiently without interrupting or rushing to give advice. |
| Resonance2 | When I confide in generative artificial intelligence, it always maintains an open mindset and does not judge my emotions or experiences. |
| Resonance3 | Generative artificial intelligence can paraphrase what I say to ensure it understands my feelings, such as saying, "It sounds like you're feeling really frustrated." |
| Resonance4 | Regardless of the emotions I express, generative artificial intelligence confirms that my emotional responses are normal and encourages me to accept them, such as saying, "Your feelings right now are perfectly normal." |
| Resonance5 | Generative artificial intelligence asks open-ended questions to guide me in further expressing my feelings, such as, "Can you tell me more about how you're feeling right now?" |
| Resonance6 | Generative artificial intelligence can imagine my current situation and understand my emotions from my perspective, saying, "I believe others would also feel frustrated in this situation." |
| Reinforcement1 | Whenever I achieve a small accomplishment, generative artificial intelligence acknowledges my efforts and uses positive words to boost my confidence. |
| Reinforcement2 | Generative artificial intelligence praises my performance after I complete a task, helping me recognize my progress and abilities. |
| Reinforcement3 | Generative artificial intelligence not only acknowledges my achievements but also encourages me to set higher goals, motivating me to keep progressing. |
| Reinforcement4 | When I make progress, generative artificial intelligence emphasizes my capabilities and potential, helping me see greater possibilities for myself. |
| Reinforcement5 | Whenever I accomplish something small, generative artificial intelligence promptly affirms it, telling me that this is just the beginning of success and encouraging me to keep moving forward. |
| Reflection1 | Generative artificial intelligence helps me review my emotions and analyze what events or situations triggered them, so I can understand why I have these feelings. |
| Reflection2 | Generative artificial intelligence encourages me to recall the entire process when my emotions occurred, reminding me to reflect on the situation and my own reactions, helping me discover key takeaways from those memories. |
| Reflection3 | Generative artificial intelligence helps me summarize my emotional experiences, extracting useful strategies and lessons that will make it easier to manage my emotions in similar situations in the future. |
| Reflection4 | Generative artificial intelligence helps me deeply reflect on the thoughts or beliefs that influenced my emotions, helping me understand why I reacted that way, so I can adjust my thinking and emotional management approach. |
